# Supplementary material
Source: Springer Nature journal article supplement (https://www.springerprofessional.de/resource/supplementary/40008_2012_16_MOESM1_ESM.pdf/11899446)
Supplement: MOESM1 [file 11899446]

## Appendix A. Results

Table A.1. Changes in relative prices and final demand as a result of subsidies elimination in gas and electricity sectors

| Economic sectors                           | Gas price                                     |                                             | Electricity price                             |                                             |
|--------------------------------------------|-----------------------------------------------|---------------------------------------------|-----------------------------------------------|---------------------------------------------|
|                                            | Increase of relative price ( $\Delta P_1\%$ ) | Decrease of final demand ( $\Delta Y_1\%$ ) | Increase of relative price ( $\Delta P_2\%$ ) | Decrease of final demand ( $\Delta Y_2\%$ ) |
| Forestry                                   | 53.9                                          | 27.0                                        | 16.4                                          | 8.2                                         |
| Agriculture and Fishing                    | 1.2                                           | 0.2                                         | 0.5                                           | 0.1                                         |
| Coal mining                                | 3.3                                           | 0.7                                         | 5.6                                           | 1.1                                         |
| Oil and gas extraction                     | 133.0                                         | 26.6                                        | 3.1                                           | 0.6                                         |
| Mining of non-energy materials             | 4.2                                           | 0.8                                         | 4.9                                           | 1.0                                         |
| Food                                       | 0.6                                           | 0.1                                         | 0.3                                           | 0.1                                         |
| Textiles                                   | 3.0                                           | 2.1                                         | 1.9                                           | 1.3                                         |
| Pulp and paper                             | 4.8                                           | 3.4                                         | 2.8                                           | 1.9                                         |
| Manufacture of coke and petroleum          | 11.1                                          | 7.8                                         | 1.1                                           | 0.8                                         |
| Chemicals and plastics                     | 5.4                                           | 3.8                                         | 1.6                                           | 1.1                                         |
| Manufacture of other non-metallic products | 7.8                                           | 5.5                                         | 3.3                                           | 2.3                                         |
| Metallurgy                                 | 1.7                                           | 1.2                                         | 1.0                                           | 0.7                                         |
| Machinery                                  | 1.2                                           | 0.9                                         | 0.7                                           | 0.5                                         |
| Other manufacture                          | 10.3                                          | 7.2                                         | 5.5                                           | 3.8                                         |
| Electricity production                     | 5.2                                           | 1.0                                         | 44.3                                          | 8.9                                         |
| Gas manufacture                            | 155.5                                         | 31.1                                        | 10.8                                          | 2.2                                         |
| Hot water supply                           | 82.0                                          | 16.4                                        | 18.0                                          | 3.6                                         |
| Water purification and                     | 39.1                                          | 7.8                                         | 178.0                                         | 35.6                                        |
| Construction                               | 2.5                                           | 1.7                                         | 1.2                                           | 0.8                                         |
| Trade and repair                           | 0.4                                           | 0.3                                         | 0.3                                           | 0.2                                         |
| Hotels and restaurants                     | 4.4                                           | 4.4                                         | 4.1                                           | 4.1                                         |
| Transport                                  | 2.0                                           | 1.4                                         | 0.7                                           | 0.5                                         |
| Finance                                    | 0.3                                           | 0.2                                         | 0.2                                           | 0.1                                         |
| Business activities                        | 0.7                                           | 0.6                                         | 0.8                                           | 0.6                                         |
| Public administration                      | 1.5                                           | 0.8                                         | 1.0                                           | 0.5                                         |
| Education                                  | 2.1                                           | 1.1                                         | 1.3                                           | 0.7                                         |
| Health care                                | 3.5                                           | 1.7                                         | 2.0                                           | 1.0                                         |
| Other                                      | 3.1                                           | 1.6                                         | 2.5                                           | 1.3                                         |

Note: sector 'Other' refers to three sectors for which detailed data on energy consumption and employment are not available, particularly, (1) Sewage and refuse disposal, sanitation and similar activities, (2) Recreational, cultural and sporting activities, (3) Other services activities.

Table A.2. Decline in gross output and employment as a result of subsidies elimination in gas and electricity sectors

| Economic sectors                           | Gas price                                  |                                                                    | Electricity price                          |                                                                    |
|--------------------------------------------|--------------------------------------------|--------------------------------------------------------------------|--------------------------------------------|--------------------------------------------------------------------|
|                                            | Decline in total output ( $\Delta X_1\%$ ) | Decline in number of jobs ( $\Delta E_{m1}$ in thousand employees) | Decline in total output ( $\Delta X_2\%$ ) | Decline in number of jobs ( $\Delta E_{m2}$ in thousand employees) |
| Forestry                                   | 4.4                                        | 0.77                                                               | 1.6                                        | 0.28                                                               |
| Agriculture and Fishing                    | 0.3                                        | 1.98                                                               | 0.1                                        | 1.01                                                               |
| Coal mining                                | 2.0                                        | 3.56                                                               | 1.1                                        | 1.92                                                               |
| Oil and gas extraction                     | 18.7                                       | 16.30                                                              | 3.4                                        | 2.95                                                               |
| Mining of non-energy materials             | 0.4                                        | 0.95                                                               | 0.2                                        | 0.46                                                               |
| Food                                       | 0.2                                        | 0.95                                                               | 0.1                                        | 0.57                                                               |
| Textiles                                   | 2.5                                        | 2.67                                                               | 1.5                                        | 1.64                                                               |
| Pulp and paper                             | 1.9                                        | 2.10                                                               | 1.0                                        | 1.14                                                               |
| Manufacture of coke                        | 2.9                                        | 1.46                                                               | 0.6                                        | 0.32                                                               |
| Chemicals and plastics                     | 2.6                                        | 4.53                                                               | 1.0                                        | 1.68                                                               |
| Manufacture of other non-metallic products | 0.7                                        | 1.05                                                               | 0.3                                        | 0.50                                                               |
| Metallurgy                                 | 0.3                                        | 1.36                                                               | 0.2                                        | 0.68                                                               |
| Machinery                                  | 0.7                                        | 4.48                                                               | 0.3                                        | 2.26                                                               |
| Other manufacture                          | 4.0                                        | 2.75                                                               | 2.1                                        | 1.47                                                               |
| Electricity production                     | 1.3                                        | 4.54                                                               | 1.7                                        | 6.01                                                               |
| Gas manufacture                            | 7.4                                        | 2.39                                                               | 1.0                                        | 0.33                                                               |
| Hot water supply                           | 9.0                                        | 9.03                                                               | 2.2                                        | 2.23                                                               |
| Water purification and distribution        | 4.1                                        | 1.28                                                               | 13.4                                       | 4.21                                                               |
| Construction                               | 0.1                                        | 0.49                                                               | 0.1                                        | 0.28                                                               |
| Trade and repair                           | 1.0                                        | 9.80                                                               | 0.4                                        | 4.07                                                               |
| Hotels and restaurants                     | 2.6                                        | 2.42                                                               | 2.2                                        | 2.04                                                               |
| Transport                                  | 1.5                                        | 14.49                                                              | 0.5                                        | 4.98                                                               |
| Finance                                    | 0.7                                        | 2.22                                                               | 0.3                                        | 1.09                                                               |
| Business activities                        | 0.9                                        | 5.45                                                               | 0.5                                        | 3.16                                                               |
| Public administration                      | 0.9                                        | 5.38                                                               | 0.6                                        | 3.50                                                               |
| Education                                  | 1.1                                        | 17.46                                                              | 0.7                                        | 10.87                                                              |
| Health care                                | 1.7                                        | 21.58                                                              | 1.0                                        | 12.49                                                              |
| Other                                      | 1.5                                        | 5.71                                                               | 1.1                                        | 4.20                                                               |

Note: sector 'Other' refers to three sectors for which detailed data on energy consumption and employment are not available, particularly, (1) Sewage and refuse disposal, sanitation and similar activities, (2) Recreational, cultural and sporting activities, (3) Other services activities.

Table A. 3. Changes in total energy and gas consumption as a result of subsidies elimination in gas and electricity sectors

| Economic sectors                    | Gas price                                                                         |                                                                           | Electricity price                                                                 |                                                                           |
|-------------------------------------|-----------------------------------------------------------------------------------|---------------------------------------------------------------------------|-----------------------------------------------------------------------------------|---------------------------------------------------------------------------|
|                                     | Decline of total energy consumption ( $\Delta E_{n1}$ in tons of coal equivalent) | Decline of gas consumption ( $\Delta E_{g1}$ in thousand m <sup>3</sup> ) | Decline of total energy consumption ( $\Delta E_{n2}$ in tons of coal equivalent) | Decline of gas consumption ( $\Delta E_{g2}$ in thousand m <sup>3</sup> ) |
| Forestry                            | 3041                                                                              | 645                                                                       | 1112                                                                              | 236                                                                       |
| Agriculture and Fishing             | 7821                                                                              | 1660                                                                      | 4006                                                                              | 850                                                                       |
| Coal mining                         | 36125                                                                             | 781                                                                       | 19504                                                                             | 422                                                                       |
| Oil and gas extraction              | 290201                                                                            | 170475                                                                    | 52570                                                                             | 30882                                                                     |
| Mining of non-energy materials      | 6525                                                                              | 2740                                                                      | 3155                                                                              | 1325                                                                      |
| Food                                | 5660                                                                              | 3899                                                                      | 3409                                                                              | 2348                                                                      |
| Textiles                            | 2353                                                                              | 1634                                                                      | 1451                                                                              | 1008                                                                      |
| Pulp and paper                      | 8587                                                                              | 6290                                                                      | 4686                                                                              | 3432                                                                      |
| Manufacture of coke and petroleum   | 1065415                                                                           | 11525                                                                     | 230705                                                                            | 2496                                                                      |
| Chemicals and plastics              | 246603                                                                            | 206199                                                                    | 91477                                                                             | 76489                                                                     |
| Manufacture of other                | 32265                                                                             | 22125                                                                     | 15446                                                                             | 10591                                                                     |
| Metallurgy                          | 138570                                                                            | 26394                                                                     | 69501                                                                             | 13238                                                                     |
| Machinery                           | 4746                                                                              | 3359                                                                      | 2394                                                                              | 1694                                                                      |
| Other manufacture                   | 37025                                                                             | 22437                                                                     | 19825                                                                             | 12014                                                                     |
| Electricity production              | 393726                                                                            | 135583                                                                    | 521950                                                                            | 179738                                                                    |
| Gas manufacture                     | 207171                                                                            | 71341                                                                     | 29066                                                                             | 10009                                                                     |
| Hot water supply                    | 783740                                                                            | 269888                                                                    | 193233                                                                            | 66542                                                                     |
| Water purification and distribution | 110999                                                                            | 38224                                                                     | 365433                                                                            | 125840                                                                    |
| Construction                        | 1329                                                                              | 124                                                                       | 769                                                                               | 72                                                                        |
| Trade and repair                    | 9253                                                                              | 2340                                                                      | 3847                                                                              | 973                                                                       |
| Hotels and restaurants              | 1255                                                                              | 731                                                                       | 1058                                                                              | 616                                                                       |
| Transport                           | 119026                                                                            | 65560                                                                     | 40924                                                                             | 22541                                                                     |
| Finance                             | 417                                                                               | 72                                                                        | 204                                                                               | 35                                                                        |
| Business activities                 | 4408                                                                              | 2022                                                                      | 2558                                                                              | 1173                                                                      |
| Public administration               | 8654                                                                              | 3347                                                                      | 5624                                                                              | 2175                                                                      |
| Education                           | 4854                                                                              | 2473                                                                      | 3021                                                                              | 1539                                                                      |
| Health care                         | 7148                                                                              | 3381                                                                      | 4136                                                                              | 1956                                                                      |
| Other                               | 2371                                                                              | 650                                                                       | 1747                                                                              | 479                                                                       |

Note: sector 'Other' refers to three sectors for which detailed data on energy consumption and employment are not available, particularly, (1) Sewage and refuse disposal, sanitation and similar activities, (2)Recreational, cultural and sporting activities, (3) Other services activities.

Table A.4. Changes in GHG emissions as a result of subsidies elimination in gas and electricity sectors

| Economic sectors                   | Gas price                                                                         |                                                  | Electricity price                                                                 |                                                  |
|------------------------------------|-----------------------------------------------------------------------------------|--------------------------------------------------|-----------------------------------------------------------------------------------|--------------------------------------------------|
|                                    | Change in GHG emissions ( $\Delta E_{e1}$ ) in thousand tons CO <sub>2</sub> -eq. | Change in GHG emissions ( $\Delta E_{e1}$ ) in % | Change in GHG emissions ( $\Delta E_{e2}$ ) in thousand tons CO <sub>2</sub> -eq. | Change in GHG emissions ( $\Delta E_{e2}$ ) in % |
| Agriculture, forestry, fishing     | 76.7                                                                              | 0.2                                              | 26.9                                                                              | 0.1                                              |
| Coal mining                        | 221.2                                                                             | 0.7                                              | 208.8                                                                             | 0.6                                              |
| Oil and gas extraction             | 5922.0                                                                            | 23.8                                             | 606.4                                                                             | 2.4                                              |
| Food production                    | 6.8                                                                               | 0.2                                              | 3.0                                                                               | 0.1                                              |
| Manufacture of coke                | 8.2                                                                               | 0.4                                              | 4.8                                                                               | 0.2                                              |
| Manufacture of petroleum           | 93.3                                                                              | 5.9                                              | 7.7                                                                               | 0.5                                              |
| Chemicals and plastics             | 409.3                                                                             | 2.3                                              | 116.7                                                                             | 0.6                                              |
| Electricity production             | 723.4                                                                             | 0.9                                              | 834.2                                                                             | 1.1                                              |
| Gas manufacture                    | 31.9                                                                              | 7.5                                              | 3.5                                                                               | 0.8                                              |
| Hot water supply                   | 1982.3                                                                            | 8.9                                              | 409.4                                                                             | 1.8                                              |
| Other manufacture and construction | 254.5                                                                             | 0.2                                              | 94.9                                                                              | 0.1                                              |
| Transport                          | 738.6                                                                             | 1.8                                              | 140.2                                                                             | 0.3                                              |
| Other                              | 77.1                                                                              | 0.5                                              | 19.4                                                                              | 0.1                                              |
| Residential                        | 302.0                                                                             | 0.8                                              | 1934.0                                                                            | 5.3                                              |
